# Supplementary material
Source: HighWire-hosted journal article supplement (https://www.cmaj.ca/highwire/filestream/58073/field_highwire_adjunct_files/0/commentaryaug2--f-la.pdf)
Supplement: commentaryaug2--f-la.pdf [file commentaryaug2--f-la.pdf]

# Médecins, la balle est maintenant dans votre camp

Steven Lewis

La version anglaise a été publiée à [www.cmaj.ca/cgi/content/full/173/3/275](http://www.cmaj.ca/cgi/content/full/173/3/275) le 20 juin 2005.

Les médecins doivent jouer un rôle pivot dans le débat sur les soins de santé privés ou publics. Ce sont eux qui fournissent la plupart des services. Or, font-ils aussi partie du problème? Dans ces pages, Steven Lewis soutient que la profession n'a pas appuyé adéquatement les soins médicaux publics et Albert Schumacher réplique au nom de l'Association médicale canadienne. Leurs points de vue suivent. John Hoey, rédacteur, *JAMC*.

La décision rendue le 9 juin 2005 par la Cour suprême clarifie le choix politique auquel fait face la profession médicale au Canada.<sup>1</sup> Beaucoup de médecins du Canada appuient avec fermeté et éloquence les soins de santé à une seule vitesse. Beaucoup ne le font pas et ne l'ont jamais fait. Il y a une décennie à peine, au cours de la réunion annuelle du Conseil général de l'AMC, une motion portant que les citoyens «doivent avoir le droit de choisir l'assurance privée réglementée pour tous les services médicaux» a été rejetée par 88 voix contre 68.<sup>2</sup> Des groupes de discussion organisés par l'AMC en 1996 ont révélé l'existence d'un abîme profond entre le solide appui de la population en faveur des soins de santé publics et les 78 % des médecins qui considéraient qu'une participation plus forte du secteur privé aux soins de santé était très ou relativement acceptable.<sup>3</sup> Bien entendu, la profession médicale s'est opposée vivement à l'avènement de l'assurance-maladie en Saskatchewan en 1962. Plus souvent qu'autrement, les organisations de médecins se sont opposées fermement à des mesures qu'elles ont acceptées par la suite. À cet égard, elles ne diffèrent d'aucun autre groupe privilégié — quelles que soient leurs vertus, celle d'être à l'écoute de la volonté du peuple n'en est pas une.

L'appui que la profession accorde aux soins de santé à une seule vitesse a toujours été provisoire et en grande partie muet — qui ne dit mot consent — face à la prolifération des cliniques à but lucratif. Des médecins se sont désengagés du système public, d'autres ont pratiqué des deux côtés de la clôture et quelques-uns ont tout simplement laissé tomber l'assurance-maladie. Jusqu'au 9 juin, l'avenir du système ne reposait pas sur les débats entre médecins. Les partisans d'une option privée et parallèle ont dû faire leur travail aux frontières de l'assurance-maladie, appuyés par un gouvernement fédéral auquel le vérificateur général avait reproché vivement de refuser d'appliquer la Loi canadienne sur la santé. Le système «privé et parallèle» a maintenant la bénédiction de la Cour suprême, mais avec une nouvelle saveur : la légalité de l'achat et la vente d'assurance pour des services médicalement nécessaires. La Cour a

donné un dur coup à l'assurance-maladie : il reste maintenant à savoir si le système est paralysé temporairement ou atteint mortellement.

Le président de l'AMC, le Dr Albert Schumacher, a déclaré que le jugement de la Cour suprême constituait «une condamnation cinglante de l'incapacité des gouvernements à réagir aux masses d'études par une intervention véritable en faveur de notre système de santé». C'est incontestable. Ce qu'il faut déterminer, c'est si le gouvernement devrait être le seul ou même le principal coupable. Les données probantes indiquent qu'il faut regarder ailleurs.

Les gouvernements financent les soins de santé et établissent le cadre législatif et réglementaire général. Ensuite, le système est en grande partie entre les mains des médecins qui prennent les décisions au jour le jour, attribuent une priorité aux patients, prescrivent des médicaments, hospitalisent les patients et leur donnent leur congé de l'hôpital, prescrivent des examens et procèdent à d'innombrables interventions avec une autonomie remarquable. Ils n'ont pas à rendre vraiment compte de leur performance. Ils semblent indifférents aux guides de pratique produits par leurs propres collègues. Leur pratique présente des variations énormes que l'on ne cherche pas à contrer en dépit des répercussions évidentes sur la qualité et l'accès.<sup>4-7</sup>

«L'intervention véritable» qui s'impose dans notre système de soins de santé inclut la réforme des soins de santé primaires, une répartition plus rationnelle de la main-d'œuvre, l'amélioration de la qualité et un recours contre les iniquités des échelles de rémunération qui attachent une valeur excessive aux chaînes de montage de la chirurgie de jour et insuffisante aux gériatres et aux rhumatologues. L'appel en faveur de ces réformes provient en grande partie des gouvernements et ce sont non pas les gouvernements, mais plutôt les médecins, qui les ont entravées ou retardées.<sup>8</sup> Romanow et Kirby ont tous deux signalé le progrès glaciaire de la réforme des soins de santé primaires. Ce sont les associations médicales, et non les gouvernements, qui répartissent les revenus entre les spécialités. Les infirmières praticiennes, les pharmaciens et les thérapeutes attendent impatiemment d'étendre leur champ d'exercice et d'utiliser pleinement leur expertise. Essayez de trouver un gouvernement qui ne soit pas d'accord. Essayez de trouver une association médicale qui le soit entièrement.

Selon la profession médicale, les défaillances du système sont toujours la faute de quelqu'un d'autre. Le retard de l'arthroplastie de la hanche de M. Zeliotis a été causé d'une

manière ou d'une autre par la nature et l'avarice du système à payeur unique. Rien n'est attribuable, semble-t-il, au fait que les médecins gardent le contrôle de leur liste d'attente individuelle et refusent de normaliser les critères d'évaluation des patients et d'attribution des priorités.<sup>9</sup> C'est la faute du gouvernement si l'on n'a pas cherché de médecins ayant des listes d'attente plus courtes, si l'on n'a pas partagé la responsabilité de l'équité ni participé aux améliorations des processus à la suite desquelles 88 % de la population du Royaume-Uni a réussi, en 2003, à obtenir des soins primaires 48 heures après en avoir fait la demande par téléphone.<sup>10</sup> C'est la faute du gouvernement, c'est parce que le gouvernement n'a pas suivi l'exemple de Whitehall en interdisant tout simplement le chaos.

Compte tenu de ses caractéristiques anarchiques, il est quasi miraculeux que le système réussisse en grande partie à bien desservir la plupart des gens la majeure partie du temps. Pour subir une chirurgie cardiaque au Manitoba, il faut attendre en moyenne 23 jours.<sup>11</sup> En Colombie-Britannique, les temps d'attente médians sont de beaucoup moins de trois mois pour chaque catégorie chirurgicale sauf la transplantation de cornée (17 semaines), les arthroplasties de la hanche (22 semaines) et du genou (28 semaines).<sup>12</sup> En Saskatchewan, 82 % des interventions chirurgicales ont été pratiquées en moins de six mois en 2004, mais les temps d'attente ont dépassé 18 mois dans 5 % des cas.<sup>13</sup> Voici où le problème se retourne contre nous : même si à peine la moitié des 5 % attendaient involontairement, ils ont subi un préjudice important.

Qui est responsable? Les gouvernements ne gèrent pas les listes d'attente. Ils ne sont pas responsables non plus du suivi, ou du non-suivi, auprès des patients qui attendent une intervention. Les gouvernements ne décident pas que le patient A sera desservi dans deux mois tandis que le patient B qui a des besoins identiques attendra 20 mois. Ce sont les médecins qui le font. La longueur des listes d'attente au Canada n'est pas attribuable à un problème de capacité : de simples calculs démontrent que personne ne doit attendre 18 mois dans un système où quatre patients sur cinq (ou plus) attendent beaucoup moins que six mois. Jusqu'à récemment, la seule réponse de la profession médicale à ces longues périodes d'attente a consisté toutefois à invoquer la pauvreté et à mobiliser le public pour s'en prendre au gouvernement. On aurait cru que le serment d'Hippocrate aurait détourné une partie de cette énergie vers ceux qui souffrent depuis longtemps. Il n'est pas nécessaire d'être cynique pour remarquer que les longues files d'attente ont servi admirablement bien le but qui consistait à extraire davantage d'argent pour les soins de santé — autant du secteur public que du secteur privé. Ils ont aussi servi de prétexte à l'affaire Chaoulli, et voilà où nous en sommes.

L'histoire de l'assurance-maladie est celle d'une lutte entre les buts de l'État que sont l'équité, l'ordre et l'efficacité, et ceux de la médecine, soit l'autonomie, l'expansion et le contrôle. La société a consenti d'énormes concessions à la profession médicale, comme le droit des médecins de prati-

quer n'importe où, le droit de demeurer des entrepreneurs indépendants plutôt que des partenaires à part entière dans un système complexe, l'affranchissement de la mesure, de l'examen et de l'imputabilité des soins dirigés à l'américaine, sans oublier des échelles de rémunération qui dépassent de loin celles qui existent dans les systèmes européens que la Cour et les critiques de l'assurance-maladie admirent sélectivement de loin. La société a aussi encouragé les gouvernements à augmenter les dépenses publiques dans une proportion ahurissante de 60 % depuis huit ans, mea culpa continu à la suite de la période de quatre ans sur les 35 dernières années au cours de laquelle les dépenses ont diminué un peu. Tout ce que le public attend en retour, c'est un engagement partagé envers l'équité d'un régime à une seule vitesse, la volonté de participer aux réformes et un rendement décent. C'est trop demander, semble-t-il.

Maintenant, grâce à la Cour suprême, les piliers législatifs du système ont subi un dur coup et les choix sont plus sombres pour les médecins. Ils peuvent maintenant laisser ouvertement tomber le système public et profiter dès le départ d'un nouveau système d'assurance privée qui s'occupe des nantis. Ils peuvent commercialiser les vertus de la médecine réifiée et concentrer leurs efforts sur les diagnostics attrayants et les interventions à gros volumes sous prétexte d'améliorer les droits que la Charte confère aux Canadiens. Finies les séances de travail non payantes avec le cas complexe du patient en gériatrie. Plus nécessaire de s'occuper de maladies chroniques irréductibles. Finis les contacts non payants avec la classe inférieure. Rémunération facile et agréable de 275 000 \$ par année pour les médecins de famille travaillant à une clinique qui regroupe des services de base aux services supplémentaires et exige 1700 \$ au départ et 2300 \$ par année.<sup>14</sup> Les chirurgiens des centres d'orthopédie et de traitement de la cataracte pourront certainement doubler et tripler facilement ce revenu.

La Cour suprême a grossi l'enjeu et le public doit connaître la position de la profession médicale. Accélérera-t-elle les réformes du système public, améliorera-t-elle son rendement pour porter un coup préventif efficace au marché de l'assurance privée? Ou se trouvera-t-elle à déléster davantage de soins sur le secteur privé ce qui, selon des données produites récemment par le système hybride de l'Australie, allonge les temps d'attente dans le secteur public?<sup>15</sup> Favorisera-t-elle une répartition équitable du revenu afin que les nouveaux médecins ne laissent plus vacants des postes en résidence en médecine familiale et en gériatrie pendant qu'ils envahissent la dermatologie et l'orthopédie? Proposera-t-elle des systèmes intégrés de gestion des listes d'attente comme celui de la Saskatchewan et y participera-t-elle afin d'assurer que les temps d'attente non contrôlés ne mettent en danger la santé d'aucun patient et que l'on sert d'abord ceux qui ont des besoins plus importants? Sautera-t-elle à l'avant-garde de la révolution de la qualité ou demeurera-t-elle une source inépuisable de matériel pour l'industrie de la recherche sur les variations régionales?<sup>16</sup>

Dans cette décision à peine majoritaire, la Cour a peut-

être fait une faveur au Canada. Il y a des décennies que nous n'avons pas eu de débat national focalisé sur la ligne à tirer en ce qui concerne les soins de santé à deux vitesses, que l'on s'en remet à des concepts imaginaires quant aux services médicaux non nécessaires et qu'on ne tient pas compte des preuves que nous avons directement sous les yeux — on a prouvé récemment que les établissements de soins de longue durée à but lucratif dispensent beaucoup moins de soins directs et de soins de soutien aux résidents que leurs homologues sans but lucratif.<sup>17</sup> Nous n'avons pas non plus débattu de façon attentive et concluante la vision de Tommy Douglas, qui ne s'est pas concrétisée, soit celle d'un continuum de soins vraiment équilibré. Les médecins luttent depuis longtemps et avec succès pour demeurer indépendants du système. On ne réussirait pas à faire construire un avion par des ingénieurs qui décideraient indépendamment quelles pièces fabriquer, si elles s'adapteront les unes aux autres et comment elles le feront. Pourquoi faudrait-il s'attendre à l'excellence d'un système de santé qui est en grande partie non gouverné et où les erreurs et l'utilisation excessives déclenchent une avalanche de financement et de revenu pendant qu'une pratique prudente et efficiente a l'effet réfrigérant de réduire les revenus?

Ce n'est pas le moment de céder à l'hystérie ou à la phobie : c'est plutôt celui de l'autoexamen, de la réflexion et du choix. La façon dont les gouvernements relèveront le défi est bien entendu d'une importance vitale et les échanges politiques promettent d'être animés. La population et les gouvernements se leurrent toutefois s'ils s'imaginent qu'un système public peut réussir sans une profession médicale généralement et officiellement vouée à ses valeurs et qui, plus souvent qu'autrement, favorise le changement constructif au lieu d'y résister.

Il y a maintenant trop longtemps que la règle du jeu consiste à dépenser davantage aux risques de perdre l'appui des médecins. Nous l'avons fait — nous avons dépensé beaucoup plus — et le rendement de l'investissement a été faible. Le Canada est un pays dirigé par des élites. La profession médicale relèvera-t-elle le défi qui consiste à créer une assurance-maladie nouvelle et améliorée ou, comme tellement d'élites, se contentera-t-elle de parler de l'intérêt public tout en agissant toutefois dans celui de minorités?

Steven Lewis est à Access Consulting Ltd. de Saskatoon (Saskatchewan) et au Centre d'études sur la santé et les politiques de l'Université de Calgary, Calgary (Alberta).

Intérêts concurrents : Aucun déclaré.

## Références

1. Chaoulli C. Québec (procureur général). 2005 CSC 35.
2. Sullivan P. Private health care dominates meeting as General Council calls for national debate. *JAMC* 1995;153(6):801-3.
3. Sullivan P. Focus groups confirm that MDs, public differ on role of private health care. *JAMC* 1996;154(8):1247-9.
4. Kennedy J, Quan H, Ghali WA, Feasby TE. Variations in rates of appropriate and inappropriate carotid endarterectomy for stroke prevention in 4 Canadian provinces. *JAMC* 2004;171(5):455-9.
5. Jaglal SB, Carroll J, Hawker G, McIsaac WJ, Jaakkimainen L, Cadarette SM, et al. How are family physicians managing osteoporosis? Qualitative study of their experiences and educational needs. *Médecin de famille canadien* 2003;49:462-8.
6. Brownell M. Tonsillectomy rates for Manitoba children: temporal and spatial variations. *Forum Gestion des soins de santé* 2002;Suppl:21-6.
7. Katz A, DeCoster C, Bogdanovic B, Soodeen RA, Chateau D. Using administrative data to develop indicators of quality in family practice. Winnipeg: Centre manitobain des politiques en matière de santé; 2004. Disponible : [www.umanitoba.ca/centres/mchp/reports/pdfs/quality\\_wo.pdf](http://www.umanitoba.ca/centres/mchp/reports/pdfs/quality_wo.pdf) (consulté le 20 juin 2005).
8. Medical Reform Group. Nearsighted physicians reject deal with government [communiqué]. Toronto : The Group; 21 novembre 2004. Disponible : [www.hwc.org/link/mrg/press.release.html#Nearsighted\\_Physicians\\_Reject\\_Deal\\_With](http://www.hwc.org/link/mrg/press.release.html#Nearsighted_Physicians_Reject_Deal_With) (consulté le 20 juin 2005).
9. Sanmartin C, Shortt SED, Barer ML, Sheps S, Lewis S, McDonald PW. Waiting for medical services in Canada: lots of heat, but little light. *JAMC* 2000;162(9):1305-10.
10. Department of Health. Achieving shorter waits: the PPF promises shorter waiting times across the service. Londres (R.-U.) : The Department; 2005. Disponible : [www.dh.gov.uk/PolicyAndGuidance/PatientChoice/WaitingBookingChoice/WaitingBookingChoiceArticle/fs/en?CONTENT\\_ID=4066038&chk=ZurIX5](http://www.dh.gov.uk/PolicyAndGuidance/PatientChoice/WaitingBookingChoice/WaitingBookingChoiceArticle/fs/en?CONTENT_ID=4066038&chk=ZurIX5) (consulté le 20 juin 2005).
11. Office régional de la santé de Winnipeg. Services de santé : Information sur les délais d'attente — chirurgie cardiaque. Winnipeg : Santé Manitoba. Disponible : [www.gov.mb.ca/health/waitlist/cardiacfr.html](http://www.gov.mb.ca/health/waitlist/cardiacfr.html) (consulté le 20 juin 2005).
12. Median wait times and wait lists. Victoria : Gouvernement de la Colombie-Britannique; 31 mars 2005. Disponible : [www.healthservices.gov.bc.ca/cpa/mediasite/waittime/median.html](http://www.healthservices.gov.bc.ca/cpa/mediasite/waittime/median.html) (révisé le 17 mai 2005, consulté le 20 juin 2005).
13. Wait time information. Regina : Réseau des soins chirurgicaux de la Saskatchewan. Disponible : [www.sasksurgery.ca/wait-list-info.html](http://www.sasksurgery.ca/wait-list-info.html) (consulté le 20 juin 2005).
14. Copeman D. Entrevue avec Don Copeman, Copeman Health Centre, Vancouver. Interviewé par Barbara Budd et Mary Lou Finlay, *As It Happens* [émission de radio]; 1<sup>er</sup> juin 2005. Produite par le réseau anglais de la société Radio Canada, Toronto. Disponible : [www.cbc.ca/insite/AS\\_IT\\_HAPPENS\\_TORONTO/2005/6/1.html](http://www.cbc.ca/insite/AS_IT_HAPPENS_TORONTO/2005/6/1.html) (consulté le 20 juin 2005).
15. Duckett SJ. Private care and public waiting. *Aust Health Rev* 2005;29:87-93.
16. Tu JV, Pinfold SP, McColgan P, Laupacis A. Avril 2005. *Access to health services in Ontario: Atlas IRSS*. Toronto : Institut de recherche en services de santé; 2005. Disponible : [www.ices.on.ca/webpage.cfm?site\\_id=1&org\\_id=67&morg\\_id=0&gsec\\_id=0&item\\_id=2862&type=atlas](http://www.ices.on.ca/webpage.cfm?site_id=1&org_id=67&morg_id=0&gsec_id=0&item_id=2862&type=atlas) (consulté le 20 juin 2005).
17. McGregor MJ, Cohen M, McGrail K, Broemeling AM, Adler RN, Schulzer M, et al. Staffing levels in not-for-profit and for-profit long-term care facilities: Does type of ownership matter? *JAMC* 2005;172(5):645-9.

**Correspondance :** Steven Lewis, Access Consulting Ltd., 211-4th Avenue S, Saskatoon SK S7K 1N1; télécopieur : 306 343-1071; [steven.lewis@shaw.ca](mailto:steven.lewis@shaw.ca)

# Les médecins font passer les patients d'abord dans le débat sur les soins de santé

Albert Schumacher

La version anglaise a été publiée à [www.cmaj.ca/cgi/content/full/173/3/277](http://www.cmaj.ca/cgi/content/full/173/3/277) le 20 juin 2005.

Il est vraiment malheureux que les commentaires malavisés et trompeurs de Steven Lewis («Médecins, la balle est maintenant dans votre camp», diffusion anticipée du *JAMC* en ligne le 20 juin 2005)<sup>1</sup> arrivent à un moment aussi crucial de l'histoire de l'assurance-maladie au Canada. Même si nous félicitons les auteurs des autres commentaires connexes d'avoir aidé à éclairer davantage le débat, M. Lewis déforme quand à lui les enjeux stratégiques sérieux auxquels nous faisons maintenant face.

Je me réjouis certes qu'il demande à la profession médicale de «relever le défi posé par la création d'un régime d'assurance-maladie nouveau et amélioré», mais il est inacceptable d'oublier et de dénigrer l'engagement de longue date que la profession a pris, depuis le début de l'histoire de notre pays, de garantir aux Canadiens accès aux services de santé.

L'histoire démontre l'appui que nous accordons à un système de santé financé par le secteur public. En 1934, l'AMC a produit des lignes directrices sur un programme de santé national financé et administré par l'État.<sup>2</sup> À l'époque de l'avènement de l'assurance-maladie, l'AMC s'est battue pour assurer que le nouveau régime protégeait la relation médecin-patient et l'autonomie clinique, principes que nous défendons toujours aujourd'hui. M. Lewis confond malheureusement l'appui de ces principes et l'opposition à un système public de santé efficient et efficace. Comme ils le faisaient à l'époque, les médecins continueront d'accepter les changements qui visent clairement à améliorer le soin des patients tout en demeurant à juste titre sceptiques face aux réformes gouvernementales qui visent avant tout à contrôler les coûts sans tenir compte des besoins des patients.

L'AMC est continuellement à l'origine d'idées, de recommandations et de débats nouveaux afin que le système fonctionne mieux pour nos patients. Que ce soit lorsqu'elle a protesté contre la décision prise par tous les gouvernements de réduire le nombre d'étudiants en médecine au début des années 1990, ou pour avertir que le «Transfert canadien en matière de santé et de programmes sociaux» lancé en 1995 constituait une abrogation de la responsabilité fédérale de maintenir la Loi canadienne sur la santé, l'AMC a toujours cherché à agir concrètement et à proposer des solutions réelles.

L'Association a poursuivi plus récemment ses efforts en

publiant *Ordonnance pour la viabilité*,<sup>3</sup> document qu'elle a présenté à la Commission de Roy Romanow sur l'avenir des soins de santé au Canada, et *Maîtriser les files d'attente : Vers une solution aux délais de prestation des soins*,<sup>4</sup> qu'elle a publié conjointement avec l'Association des infirmières et infirmiers du Canada et qui a fait l'objet de discussions au cours de la réunion sur les soins de santé que les premiers ministres ont tenue l'automne dernier.

Comme intervenant dans l'affaire *Chaoulli c. Québec*<sup>5</sup> devant la Cour suprême du Canada, l'AMC a réaffirmé qu'elle appuyait un système de santé financé par le secteur public où l'accès est fondé sur le besoin et non sur la capacité de payer. Cet appui repose sur la croyance selon laquelle un tel système produit les meilleurs résultats pour la santé de nos patients et de toute la population canadienne. Un système de santé qui échoue au test fondamental de l'accès aux soins en temps opportun n'est toutefois pas viable. Si les gouvernements n'interviennent pas pour fournir des ressources suffisantes dans le système public, le contrat social que constitue l'assurance-maladie est alors en danger.

Le système de santé public est en fait un arrangement complexe et délicat constitué de 13 régimes distincts d'assurance-maladie qui doivent se conformer à une série générale d'orientations établies dans la Loi canadienne sur la santé. La Loi constitue en fait un ensemble éprouvé des principes qui sous-tendent la façon dont il faudrait payer les services de santé au Canada.

M. Lewis qualifie de provisoire l'appui que les médecins accordent au système et il a parfaitement raison – notre appui est conditionnel à la prestation en temps opportun d'un accès à des soins de santé de grande qualité. Notre appui doit toujours être conditionnel. Une allégeance idéologique aveugle à n'importe quel système n'est pas dans le meilleur intérêt des patients.

Dans le contexte actuel, la viabilité de la loi passe par le leadership des gouvernements et les solutions pratiques que trouveront tous les intervenants. Sur le plan pratique, elle doit ouvrir le processus introspectif d'élaboration de politiques afin de réunir des idées d'une multitude de sources et de les mettre en pratique. L'Alliance sur les temps d'attente, qui a dégagé un consensus sur des points de repère relatifs à l'accès en temps opportun aux soins, en est un exemple. Elle présentera bientôt une «trousse de stratégies» afin d'aider tous les gouvernements à assurer

que les Canadiens ont accès aux services médicaux en temps opportun.

Contrairement à ce qu'affirme M. Lewis, la raison pour laquelle la Loi canadienne sur la santé est en difficulté aujourd'hui n'a rien à voir avec le manque d'appui de la profession médicale. Les preuves indiquent indéniablement que la difficulté fondamentale réside dans une capacité limitée et dans les ressources humaines de la santé. En affirmant que les médecins laissent les gens attendre plus longtemps pour en tirer un profit personnel, il tient des propos erronés et il offense les médecins du Canada qui, tous les jours, font passer les besoins de leurs patients en premier, souvent au prix de grands sacrifices personnels. Nous visons toujours l'accès en temps opportun, l'autonomie professionnelle et les soins de qualité aux patients.

Lorsque la Cour suprême a publié sa décision le 9 juin, j'ai fait la déclaration suivante au nom des membres de l'AMC : «Une chose est certaine : les médecins continueront de faire passer leurs patients d'abord. J'ai juré de faire tout mon possible pour mes patients — ainsi que l'ont fait tous mes collègues médecins — et cela ne changera pas simplement parce que notre programme national d'assurance-maladie fait maintenant face à des changements importants.»

Au cours des semaines et des mois qui viennent, l'AMC

discutera de façons de renforcer le système de santé financé par le secteur public au Canada dans le contexte de la réalité que constitue la décision de la Cour suprême. Nous avons lancé un débat très nuancé qui nous oblige à réfléchir posément et à nous concentrer sur les faits. Je sais que les médecins du Canada chercheront comme toujours à faire de leur mieux pour leurs patients.

D<sup>r</sup> Schumacher est le Président de l'Association Médicale Canadienne.

Intérêts concurrents : Aucun déclaré.

## Références

1. Lewis S. Médecins, la balle est maintenant dans votre camp. *JAMC* 2005; 173(3):online-1–online 3. Disponible : [www.cmaj.ca/cgi/content/full/173/3/275/DC1](http://www.cmaj.ca/cgi/content/full/173/3/275/DC1).
2. Temple de la renommée médicale canadienne. Description des lauréats. London (ON) : Hall Associates; 2004. Disponible : [http://cdnmedhall.org/laureates/?laur\\_id=68](http://cdnmedhall.org/laureates/?laur_id=68) (consulté le 20 juin 2005).
3. Association Médicale Canadienne. *Mémoire de l'AMC à la Commission Romanow : Ordonnance pour la viabilité*. Ottawa: l'Association; 2002.
4. Gruenewoldt E, Saulnier M, Shortt, SED. *Maîtriser les files d'attente. Vers une solution aux délais de prestation des soins*. Ottawa: Association médicale canadienne et Association des infirmières et infirmiers du Canada; 2004.
5. *Chaoulli c. Québec (procureur général)*. 2005 CSC 35.

**Correspondance :** D<sup>r</sup> Albert Schumacher, Association Médicale Canadienne, 1867 Prom. Alta Vista, Ottawa ON K1G 3Y6
